# Supplementary material for: Effects of Backfat Thickness on Oxidative Stress and Inflammation of Placenta in Large White Pigs
Source: MDPI journal article supplement (doi:10.3390/vetsci9060302), 2022-06-19
Supplement: s1 [file s1]

**Table S1.** Ingredient and nutrient composition of the experimental diets.

| Feed Composition           | Ratio |
|----------------------------|-------|
| <b>Ingredients (%)</b>     |       |
| Corn                       | 58.00 |
| Soybean meal (43%)         | 18.00 |
| Extruded soybean           | 6.00  |
| Imported fish meal         | 3.50  |
| Soybean oil                | 2.00  |
| Sugar                      | 2.50  |
| Bran                       | 6.00  |
| Premix <sup>1</sup>        | 4.00  |
| <b>Nutrient levels (%)</b> |       |
| Crude protein              | 18.51 |
| Crude fa                   | 2.83  |
| Crude fiber                | 2.77  |
| Lys                        | 0.99  |
| Met + Cys                  | 0.58  |
| Arg                        | 1.25  |
| Ca (%)                     | 0.40  |
| P (%)                      | 0.40  |
| Na (%)                     | 0.33  |
| Ka (%)                     | 0.29  |

<sup>1</sup> Vitamin and mineral premix supplied per kg diet: 9,600 IU vitamin A, 1,800 IU vitamin D<sub>3</sub>, 24 mg vitamin E, 1.5 mg vitamin B<sub>1</sub>, 12 mg vitamin B<sub>2</sub>, 2.4 mg vitamin B<sub>6</sub>, 0.045 mg vitamin B<sub>12</sub>, 1.5 mg vitamin K<sub>3</sub>, 24 mg pantothenic acid, 45 mg niacin, 0.09 mg biotin, 0.39 mg folic acid, 7.2 mg ethoxyquin, 167.58 mg Fe (FeSO<sub>4</sub>), 15.23 mg Cu (CuSO<sub>4</sub>·H<sub>2</sub>O), 153.09 mg Zn (ZnSO<sub>4</sub>), 50.31 mg Mn (MnO<sub>2</sub>), 0.9 mg I (Ca(IO<sub>3</sub>)), 0.45 mg Se (Na<sub>2</sub>SeO<sub>3</sub>).

**Table S2.** Primer sequences for quantitative real-time polymerase chain reaction.

| Gene          | GenBank<br>Accession no. | Primer sequences (5-3)                   |                            | Annealing<br>temperature<br>(°C) | Length<br>(bp) |
|---------------|--------------------------|------------------------------------------|----------------------------|----------------------------------|----------------|
|               |                          | Forward                                  | Reverse                    |                                  |                |
| <i>IL-6</i>   | NC_010451.3              | AGTCCAGTCGCCTTCTCCCT                     | CAGAGATTTTGCCGAGGATG       | 61                               | 87             |
| <i>IL-6R</i>  | NM_214403.1              | GACCCTATGCGTCGCCAACATTGCCAGGTGACACTGAGCC |                            | 63                               | 78             |
| <i>TNF-α</i>  | NC_010449.4              | TTCTGCCTACTGCACTTCGA                     | GGCTTTGACATTGGCTACAA       | 58                               | 128            |
| <i>TNFR1</i>  | NC_010447.4              | GAACGCAGACTGCAAGAA                       | CTAAGCCAACGAAGAGGAA<br>G   | 61                               | 216            |
| <i>SOCS3</i>  | NC_010454.4              | ATGGTCACCCACAGCAAGTT                     | AATCCGCTCTCCTGCAGCTT       | 60                               | 128            |
| <i>LOX-1</i>  | NC_010447.4              | TGCTCCACTCCCTCATTCTT                     | ACCAGTAATCCCAGGCACA<br>G   | 60                               | 111            |
| <i>PIGF1</i>  | NC_010445.4              | TGTCCTTCTGAGTCGCTGTA<br>GT               | GCATAGTGATGTTGGCTGTC<br>TT | 59                               | 110            |
| <i>VEGF-A</i> | NC_010449.5              | CAACGACGAAGGTCTGGAG<br>TG                | GCCTCGCTCTATCTTTCTTTG<br>G | 61                               | 124            |
| <i>GAPDH</i>  | NC_010447.4              | CGTCAAGCTCATTTCCTGGT                     | TGGGATGGAAACTGGAAGT<br>C   | 59                               | 210            |
